# Supplementary material for: Efficacy and safety of efpeglenatide in key patient subgroups from the BALANCE randomized trial, stratified by pre-diabetes status, BMI, and age at baseline
Source: HighWire-hosted journal article supplement (doi:10.1136/bmjdrc-2021-002207), 2022-01-01
Supplement: bmjdrc-2021-002207supp001_data_supplement.pdf [file bmjdrc-2021-002207supp001_data_supplement.pdf]

# 1 Supplementary Material

## 2 Supplementary Figure S1 BALANCE study design

3 BMI body mass index, QW once weekly, Q2W once every 2 weeks

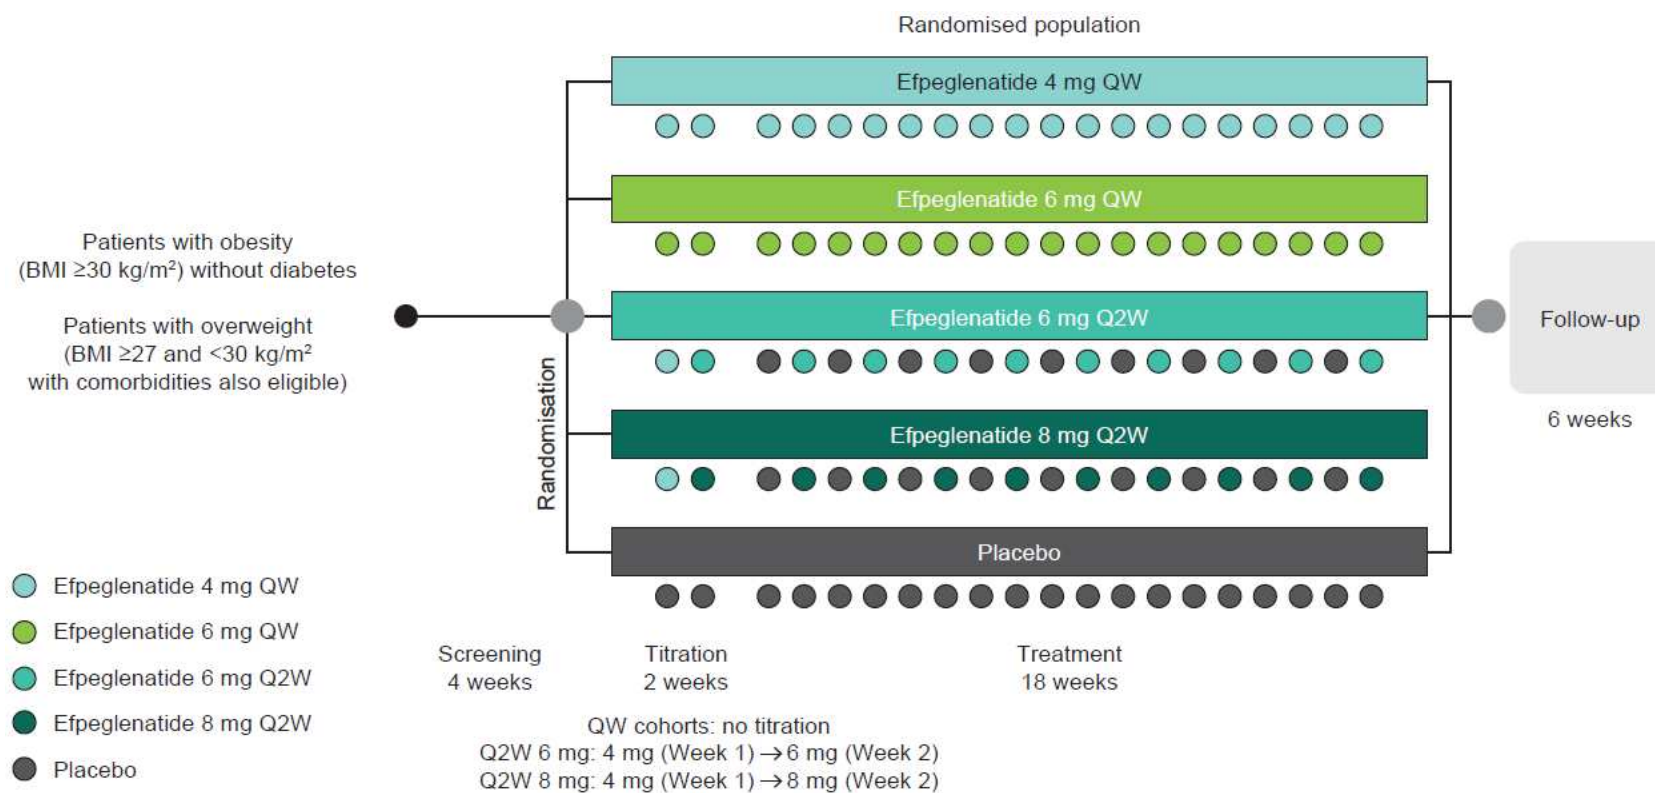

4

1

5 **Supplementary Figure S2 Patients with prediabetes: change from baseline to Week 21 versus placebo in waist circumference**

6 95.1% CI data are shown in brackets

7 *CI confidence interval, Efpeg efpeglenatide, LS least square, QW once weekly, Q2W once every 2 weeks*8 \* $p < 0.05$ ; \*\* $p < 0.01$ 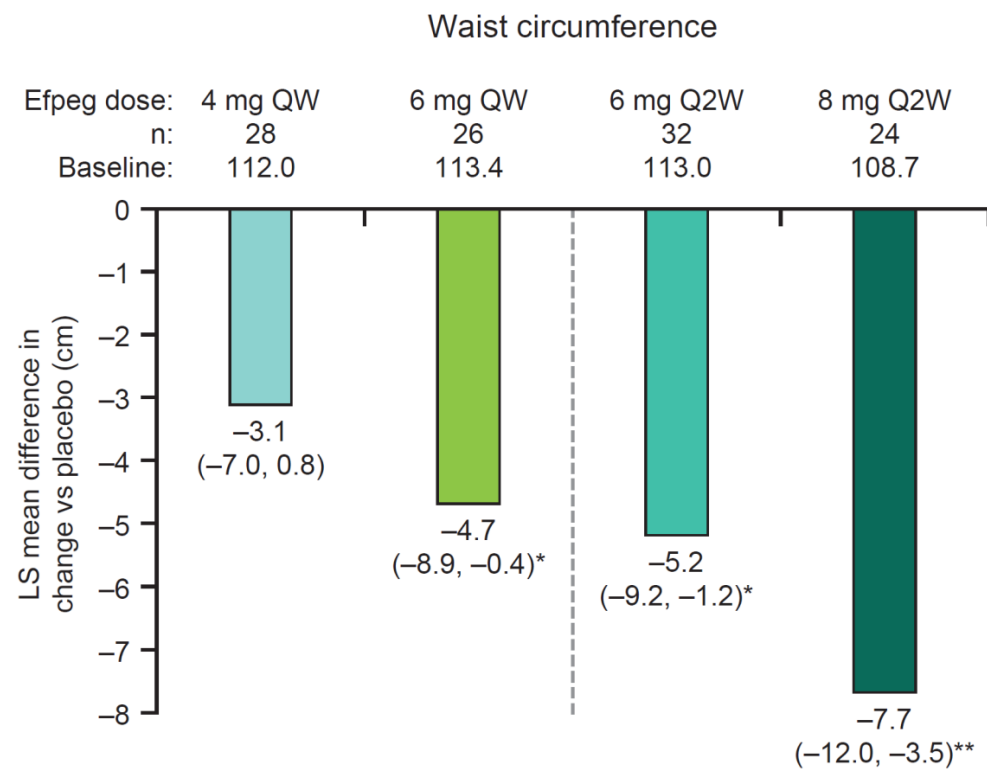

9

2

- 10 **Supplementary Figure S3 Patients with prediabetes: change from baseline to Week 21 versus placebo in (a) total cholesterol,**  
 11 **(b) LDL-C, (c) HDL-C, and (d) triglycerides**  
 12 95.1% CI data are shown in brackets  
 13 *CI confidence interval, Epeg efpeglenatide, HDL high-density lipoprotein, LDL low-density lipoprotein, LS least square, QW once weekly, Q2W*  
 14 *once every 2 weeks*  
 15 \* $p < 0.05$ ; \*\* $p < 0.01$

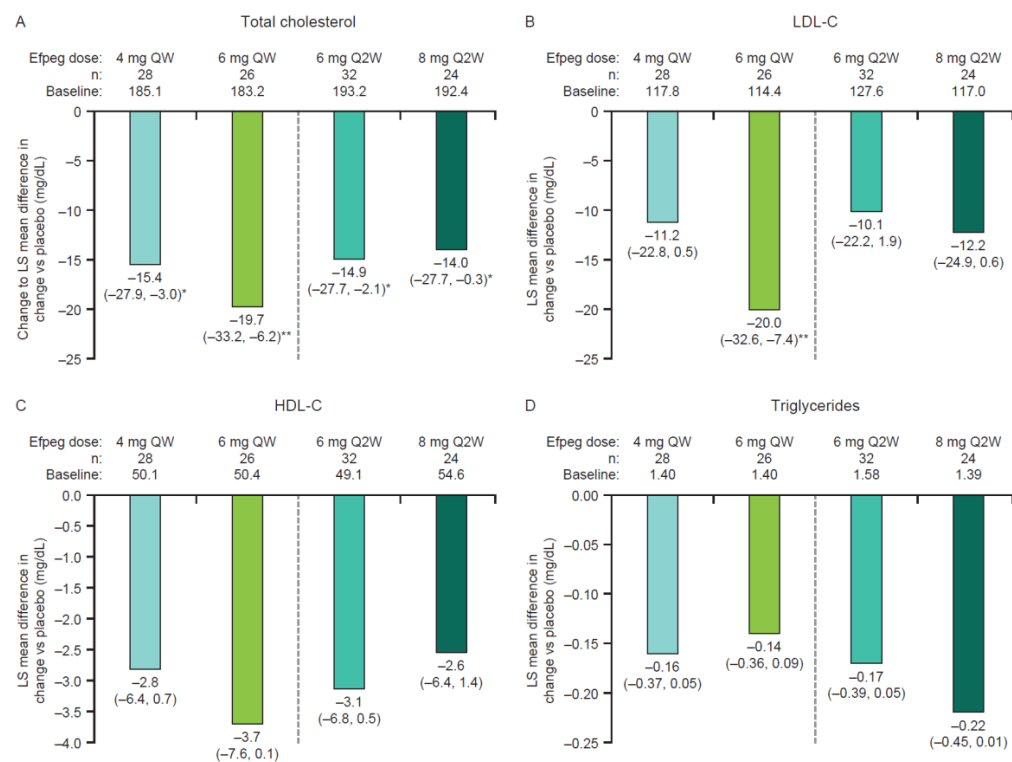

16

3

17 **Supplementary Table S1 Details of ethics review boards**

| Country     | Review board                                                                                         | Local/Central | ID                    |
|-------------|------------------------------------------------------------------------------------------------------|---------------|-----------------------|
| Germany     | CRC Hanover*                                                                                         | Central       | 6619M                 |
| Germany     | Landesamt für Gesundheit und Soziales Berlin, Geschäftsstelle der Ethik-Kommission des Landes Berlin | Local         | –                     |
| Germany     | Ethikkommission bei der Sächsischen Landesärztekammer                                                | Local         | –                     |
| Germany     | Ethikkommission der Landesärztekammer Baden-Württemberg                                              | Local         | –                     |
| Germany     | Ethikkommission der Ärztekammer Nordrhein                                                            | Local         | –                     |
| Hungary     | Egészségügyi Tudományos Tanács Klinikai Farmakológiai Etikai Bizottsága                              | Central       | OGYI/2370-8/2014      |
| Netherlands | METC BRABANT                                                                                         | Central       | P1404                 |
| South Korea | Inje University Seoul Paik Hospital                                                                  | Local         | SIT-2014-032          |
| South Korea | Kyung Hee University Hospital at Gangdong                                                            | Local         | KHNMC 2014-02-005-023 |
| South Korea | Korea University Guro Hospital                                                                       | Local         | KUGH13283-024         |
| South Korea | Chungnam National University Hospital                                                                | Local         | CNUH 2014-02-005-023  |
| South Korea | Bucheon St. Mary's Hospital                                                                          | Local         | HC14MGGS0023          |
| South Korea | Asan Medical Center                                                                                  | Local         | 2014-0362             |
| South Korea | Konkuk University Medical Center                                                                     | Local         | KUH1230016            |
| U.S.        | Quorum Review Institutional Review Board                                                             | Central       | 28889                 |

18 \*The CRC Hanover review board replaced the local review boards in Germany and local IRB numbers are not available.

19

20 **Supplementary Table S2 Patients with prediabetes: key treatment-emergent adverse events (full analysis set)**

| Treatment-emergent AEs, n (%) <sup>a</sup>    | Efpeglenatide     |                   |                    |                    |                   |
|-----------------------------------------------|-------------------|-------------------|--------------------|--------------------|-------------------|
|                                               | 4 mg QW<br>(n=28) | 6 mg QW<br>(n=26) | 6 mg Q2W<br>(n=32) | 8 mg Q2W<br>(n=24) | Placebo<br>(n=30) |
| <b>Any TEAEs</b>                              | 24 (85.7)         | 23 (88.5)         | 31 (96.9)          | 21 (87.5)          | 24 (80.0)         |
| <b>Any serious TEAEs</b>                      | 1 (3.6)           | 2 (7.7)           | 0                  | 2 (8.3)            | 0                 |
| <b>Gastrointestinal disorders<sup>b</sup></b> | 18 (64.3)         | 20 (76.9)         | 23 (71.9)          | 17 (70.8)          | 12 (40.0)         |
| Nausea                                        | 15 (53.6)         | 12 (46.2)         | 17 (53.1)          | 11 (45.8)          | 5 (16.7)          |
| Vomiting                                      | 4 (14.3)          | 5 (19.2)          | 7 (21.9)           | 7 (29.2)           | 3 (10.0)          |
| Diarrhoea                                     | 4 (14.3)          | 3 (11.5)          | 8 (25.0)           | 4 (16.7)           | 6 (20.0)          |
| <b>Symptomatic hypoglycaemia<sup>c</sup></b>  | 0                 | 1 (3.8)           | 0                  | 0                  | 0                 |

21 <sup>a</sup>Number of patients who reported at least one event; percentage calculated using subgroup n number as denominator; <sup>b</sup>Gastrointestinal  
22 TEAEs included nausea, vomiting, diarrhoea, dyspepsia and constipation; <sup>c</sup>Reported by patients in study diaries (with an alert value of FPG  
23 ≤70 mg/dL; no severe cases were reported [defined as hypoglycaemia requiring assistance from another person to administer carbohydrates or  
24 glucagon actively, or take other corrective actions])  
25 *FPG* fasting plasma glucose, *QW* once weekly, *Q2W* once every 2 weeks, *TEAE* treatment-emergent adverse event

26 **Supplementary Table S3 Patients stratified by BMI and age at baseline: gastrointestinal treatment-emergent adverse events and**  
 27 **amylase and lipase increases by subgroup (full analysis set)**

|                             |              | Efpeglenatide    |                  |                   |                   |                   |
|-----------------------------|--------------|------------------|------------------|-------------------|-------------------|-------------------|
|                             |              | 4mg QW<br>(n=59) | 6mg QW<br>(n=59) | 6mg Q2W<br>(n=59) | 8mg Q2W<br>(n=58) | Placebo<br>(n=60) |
| <b>BMI &lt; or ≥ median</b> |              |                  |                  |                   |                   |                   |
| GI disorders                | BMI < Median | 24/32 (75.00%)   | 22/23 (95.65%)   | 20/28 (71.43%)    | 24/32 (75.00%)    | 14/31 (45.16%)    |
|                             | BMI ≥ Median | 19/27 (70.37%)   | 27/36 (75.00%)   | 18/31 (58.06%)    | 20/26 (76.92%)    | 14/29 (48.28%)    |
| Nausea                      | BMI < Median | 18/32 (56.25%)   | 16/23 (69.57%)   | 14/28 (50.00%)    | 20/32 (62.50%)    | 5/31 (16.13%)     |
|                             | BMI ≥ Median | 14/27 (51.85%)   | 19/36 (52.78%)   | 14/31 (45.16%)    | 16/26 (61.54%)    | 6/29 (20.69%)     |
| Vomiting                    | BMI < Median | 8/32 (25.00%)    | 3/23 (13.04%)    | 5/28 (17.86%)     | 9/32 (28.13%)     | 2/31 (6.45%)      |
|                             | BMI ≥ Median | 5/27 (18.52%)    | 10/36 (27.78%)   | 5/31 (16.13%)     | 10/26 (38.46%)    | 2/29 (6.90%)      |
| Diarrhoea                   | BMI < Median | 8/32 (25.00%)    | 10/23 (43.48%)   | 8/28 (28.57%)     | 8/32 (25.00%)     | 7/31 (22.58%)     |
|                             | BMI ≥ Median | 6/27 (22.22%)    | 2/36 (5.56%)     | 7/31 (22.58%)     | 8/26 (30.77%)     | 5/29 (17.24%)     |
| Dyspepsia                   | BMI < Median | 10/32 (31.25%)   | 8/23 (34.78%)    | 4/28 (14.29%)     | 9/32 (28.13%)     | 1/31 (3.23%)      |
|                             | BMI ≥ Median | 2/27 (7.41%)     | 8/36 (22.22%)    | 5/31 (16.13%)     | 6/26 (23.08%)     | 1/29 (3.45%)      |
| Constipation                | BMI < Median | 7/32 (21.88%)    | 4/23 (17.39%)    | 6/28 (21.43%)     | 8/32 (25.00%)     | 3/31 (9.68%)      |
|                             | BMI ≥ Median | 3/27 (11.11%)    | 8/36 (22.22%)    | 3/31 (9.68%)      | 4/26 (15.38%)     | 2/29 (6.90%)      |

|                             |              | <b>Efpeglenatide</b>     |                          |                           |                           |                           |
|-----------------------------|--------------|--------------------------|--------------------------|---------------------------|---------------------------|---------------------------|
|                             |              | <b>4mg QW<br/>(n=59)</b> | <b>6mg QW<br/>(n=59)</b> | <b>6mg Q2W<br/>(n=59)</b> | <b>8mg Q2W<br/>(n=58)</b> | <b>Placebo<br/>(n=60)</b> |
| Lipase increased            | BMI < Median | 3/32 (9.38%)             | 1/23 (4.35%)             | 0/28 (0.00%)              | 3/32 (9.38%)              | 2/31 (6.45%)              |
|                             | BMI ≥ Median | 1/27 (3.70%)             | 0/36 (0.00%)             | 1/31 (3.23%)              | 0/26 (0.00%)              | 0/29 (0.00%)              |
| Amylase increased           | BMI < Median | 2/32 (6.25%)             | 1/23 (4.35%)             | 0/28 (0.00%)              | 0/32 (0.00%)              | 0/31 (0.00%)              |
|                             | BMI ≥ Median | 0/27 (0.00%)             | 0/36 (0.00%)             | 0/31 (0.00%)              | 0/26 (0.00%)              | 0/29 (0.00%)              |
| <b>Age &lt; or ≥ median</b> |              |                          |                          |                           |                           |                           |
| GI disorders                | Age < Median | 19/28 (67.86%)           | 25/31 (80.65%)           | 18/28 (64.29%)            | 16/28 (57.14%)            | 13/28 (46.43%)            |
|                             | Age ≥ Median | 24/31 (77.42%)           | 24/28 (85.71%)           | 20/31 (64.52%)            | 28/30 (93.33%)            | 15/32 (46.88%)            |
| Nausea                      | Age < Median | 16/28 (57.14%)           | 18/31 (58.06%)           | 16/28 (57.14%)            | 14/28 (50.00%)            | 4/28 (14.29%)             |
|                             | Age ≥ Median | 16/31 (51.61%)           | 17/28 (60.71%)           | 12/31 (38.71%)            | 22/30 (73.33%)            | 7/32 (21.88%)             |
| Vomiting                    | Age < Median | 5/28 (17.86%)            | 9/31 (29.03%)            | 6/28 (21.43%)             | 7/28 (25.00%)             | 1/28 (3.57%)              |
|                             | Age ≥ Median | 8/31 (25.81%)            | 4/28 (14.29%)            | 4/31 (12.90%)             | 12/30 (40.00%)            | 3/32 (9.38%)              |
| Diarrhoea                   | Age < Median | 7/28 (25.00%)            | 6/31 (19.35%)            | 8/28 (28.57%)             | 8/28 (28.57%)             | 5/28 (17.86%)             |
|                             | Age ≥ Median | 7/31 (22.58%)            | 6/28 (21.43%)            | 7/31 (22.58%)             | 8/30 (26.67%)             | 7/32 (21.88%)             |
| Dyspepsia                   | Age < Median | 4/28 (14.29%)            | 9/31 (29.03%)            | 3/28 (10.71%)             | 6/28 (21.43%)             | 1/28 (3.57%)              |
|                             | Age ≥ Median | 8/31 (25.81%)            | 7/28 (25.00%)            | 6/31 (19.35%)             | 9/30 (30.00%)             | 1/32 (3.13%)              |

|                   |              | <b>Efpeglenatide</b> |               |                |                |                |
|-------------------|--------------|----------------------|---------------|----------------|----------------|----------------|
|                   |              | <b>4mg QW</b>        | <b>6mg QW</b> | <b>6mg Q2W</b> | <b>8mg Q2W</b> | <b>Placebo</b> |
|                   |              | <b>(n=59)</b>        | <b>(n=59)</b> | <b>(n=59)</b>  | <b>(n=58)</b>  | <b>(n=60)</b>  |
| Constipation      | Age < Median | 4/28 (14.29%)        | 5/31 (16.13%) | 2/28 (7.14%)   | 5/28 (17.86%)  | 3/28 (10.71%)  |
|                   | Age ≥ Median | 6/31 (19.35%)        | 7/28 (25.00%) | 7/31 (22.58%)  | 7/30 (23.33%)  | 2/32 (6.25%)   |
| Lipase increased  | Age < Median | 2/28 (7.14%)         | 1/31 (3.23%)  | 1/28 (3.57%)   | 0/28 (0.00%)   | 1/28 (3.57%)   |
|                   | Age ≥ Median | 2/31 (6.45%)         | 0/28 (0.00%)  | 0/31 (0.00%)   | 3/30 (10.00%)  | 1/32 (3.13%)   |
| Amylase increased | Age < Median | 1/28 (3.57%)         | 1/31 (3.23%)  | 0/28 (0.00%)   | 0/28 (0.00%)   | 0/28 (0.00%)   |
|                   | Age ≥ Median | 1/31 (3.23%)         | 0/28 (0.00%)  | 0/31 (0.00%)   | 0/30 (0.00%)   | 0/32 (0.00%)   |

28 Median BMI=34.9 kg/m<sup>2</sup>; median age=44 years

29 BMI body mass index, GI gastrointestinal, QW once weekly, Q2W once every 2 weeks

30
